# Supplementary material for: Reduced graphene oxide/nickel nanocomposites: facile synthesis, magnetic and catalytic properties
Source: Royal Society of Chemistry journal article supplement (doi:10.1039/c2jm14680k), 2012-01-01
Supplement: c2jm14680k.pdf [file c2jm14680k.pdf]

Electronic Supplementary Information (ESI) for

## Reduced graphene oxide/nickel nanocomposites: Facile synthesis, magnetic and catalytic properties

Zhenyuan Ji,<sup>a,b</sup> Xiaoping Shen,<sup>\*a</sup> Guoxing Zhu,<sup>a</sup> Hu Zhou<sup>c</sup> and Aihua Yuan<sup>c</sup>

<sup>a</sup> School of Chemistry and Chemical Engineering, Jiangsu University, Zhenjiang, 212013, China

<sup>b</sup> School of Materials Science and Engineering, Jiangsu University, Zhenjiang 212013, China

<sup>c</sup> School of Materials Science and Engineering, Jiangsu University of Science and Technology, Zhenjiang, 212003, China

\*Corresponding author. E-mail: xiaopingshen@163.com

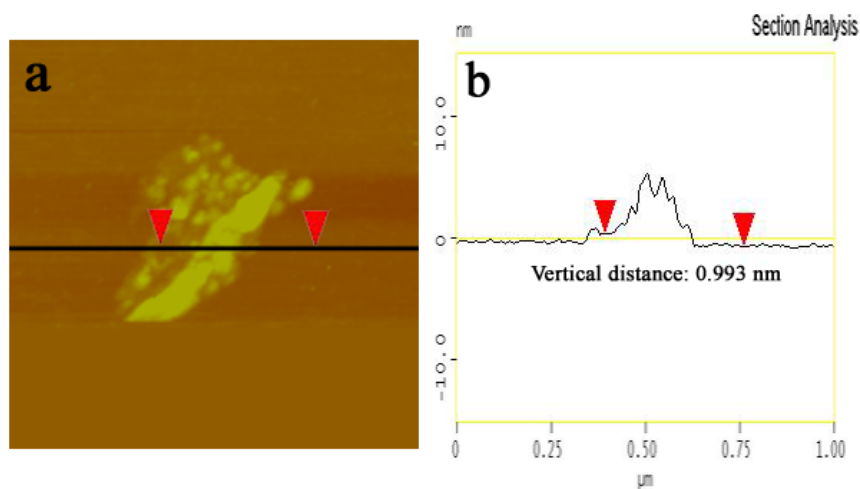

**Fig. S1** (a) AFM image of RGO/Ni-1 nanocomposites and (b) the cross section analysis.

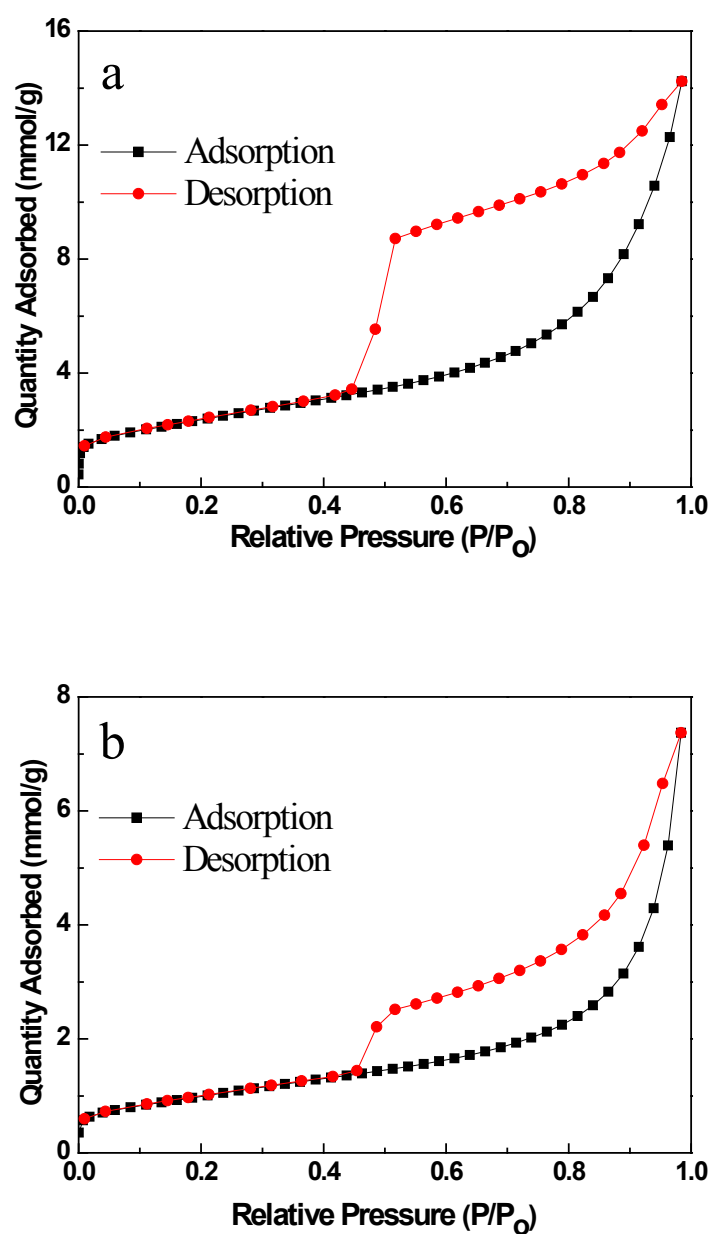

**Fig. S2** Nitrogen adsorption and desorption isotherms of (a) RGO/Ni-1 and (b) RGO/Ni-2 nanocomposites.
